# Supplementary material for: Well-defined palladium–ceria interfacial electronic effects trigger CO oxidation
Source: Royal Society of Chemistry journal article supplement (doi:10.1039/c8cc04935a), 2018-01-01
Supplement: c8cc04935a1.pdf [file c8cc04935a1.pdf]

Electronic Supplementary Information (ESI)

# Well-Defined Palladium-Ceria Interfacial Electronic Effects Trigger CO Oxidation†

Yaxin Chen, Junxiao Chen, Weiye Qu, Christian George, Mimoun Aouine, Philippe Vernoux, and  
Xingfu Tang\*

## Contents:

### 1. Experimental Section

|                                                  |   |
|--------------------------------------------------|---|
| 1.1. Catalyst syntheses.....                     | 2 |
| 1.2. HRTEM images.....                           | 2 |
| 1.3. X-ray absorption spectra.....               | 3 |
| 1.4. X-ray photoelectron spectroscopy.....       | 3 |
| 1.5. Synchrotron X-ray diffraction patterns..... | 4 |
| 1.6. Catalytic oxidation of CO.....              | 4 |

### 2. Figures and Tables

|                                                                                                                     |           |
|---------------------------------------------------------------------------------------------------------------------|-----------|
| Figure S1. Size distribution of the Pd cubes counted from the TEM images.....                                       | 5         |
| Figure S2. Side-viewed HRTEM image of Pd/CeO <sub>2</sub> and the corresponding Fast Fourier transform pattern..... | 6         |
| Figure S3. Side-viewed HRTEM image of Pd/CeO <sub>2</sub> . .....                                                   | 7         |
| Figure S4. Atomic arrangements of the (100) <sub>Pd</sub> plane and the (100) <sub>CeO<sub>2</sub></sub> plane..... | 8         |
| Figure S5. SXRD patterns of samples including the Rietveld refinements.....                                         | 9         |
| Figure S6. Scheme illustrating the interfacial atom arrangement.....                                                | 10        |
| Figure S7. Ce 3d XPS of Pd/CeO <sub>2</sub> and CeO <sub>2</sub> .....                                              | 11        |
| Figure S8. O 1s XPS of Pd/CeO <sub>2</sub> and CeO <sub>2</sub> .....                                               | 12        |
| Figure S9. Arrhenius plot for the reaction rates in the CO oxidation and the corresponding E <sub>a</sub> .....     | 13        |
| Table S1. Crystallographic data and the Rietveld refinements.....                                                   | 14        |
| Table S2. Structure constants of the samples determined by the Rietveld refinements.....                            | 15        |
| <b>3. References</b> .....                                                                                          | <b>16</b> |

## Experimental Procedures

### 1.1. Catalyst syntheses

For the synthesis of CeO<sub>2</sub> rods,<sup>[1]</sup> CeCl<sub>3</sub> · 7H<sub>2</sub>O (0.45 g) was dissolved in 5 mL de-ionized water to form a solution, which was added into 25 mL of NaOH solution (C<sub>NaOH</sub> = 9 mol L<sup>-1</sup>) under vigorous stirring. The suspension was transferred to a 50 mL Teflon-lined stainless-steel autoclave and held in 140 °C for 48 h. After the autoclave was cooled to room temperature naturally, fresh precipitates were separated by centrifugation, washed with de-ionized water to neutrality, dried, and calcined at 400 °C for 4 h to give the CeO<sub>2</sub> rods.

For the synthesis of Pd cubes, we followed the protocol developed by Xia and co-workers.<sup>[2]</sup> In a typical procedure, 40 mL of an aqueous solution containing poly(vinyl pyrrolidone) (PVP, 0.525 g), L-ascorbic acid (0.3 g), KCl (0.925 g) and KBr (0.025g) were placed in a 250 mL conical flask, and pre-heated in air under magnetic stirring at 80 °C for 10 min. Then, 15 mL of an aqueous solution containing Na<sub>2</sub>PdCl<sub>4</sub> (0.285 g) was added. After the conical flask had been capped, the reaction was allowed to proceed at 80 °C for 3h. The as-prepared solution (25 mL) was added into a 20 mL of an aqueous solution containing CeO<sub>2</sub> rods (1 g) to get Pd/CeO<sub>2</sub>. The pure Pd and Pd/CeO<sub>2</sub> were collected by centrifugation and washed 10 times with water to remove excess PVP.

### 1.2. HRTEM images

HRTEM images were carried out with a JEOL JEM-2100F field-emission gun transmission electron microscope operating at an accelerating voltage of 200 kV and equipped with an ultra-high resolution pole-piece that provides a point-resolution better than 0.19 nm. Fine powders of the materials were dispersed in ethanol, sonified, and sprayed on a carbon coated copper grid, and then allowed to air-dry for imaging. TEM and HRTEM images of the Pd cubes were also carried out with An FEI TITAN ETEM G2 80–300 kV instrument equipped with an objective Cs aberration corrector.

### *1.3. X-ray absorption spectra*

The Ce  $L_3$ -edge X-ray absorption near edge structure (XANES) spectroscopy were measured at BL14W of the SSRF with an electron beam energy of 3.5 GeV and a ring current of 200-300 mA. Data were collected with a fixed exit mono-chromator using two flat Si(111) crystals. Harmonics were rejected by using a grazing incidence mirror. The XANES spectra were acquired at an energy step of 0.5 eV. The raw data were analyzed using the IFEFFIT 1.2.11 software package.

### *1.4. X-ray photoelectron spectroscopy*

X-ray photoelectron spectra (XPS) were collected using an ESCALAB 250Xi Instrument (ESCALAB 250Xi, ThermoFisher Scientific) with a monochromated Al-K $\alpha$  X-ray gun (1486.6 eV), which was operated at high voltages of 12.5 kV with emission currents of 16 mA. Spectra were acquired at normal emission with a passing energy of 40 eV. XPS were referenced to the C 1s peak at the binding energy (BE) of 284.6 eV. Data analysis and processing were undertaken using the XPSPeak4.1 software with the Shirley type background.

For the Pd 3d XPS, the splitting energy between Pd 3d<sub>5/2</sub> and Pd 3d<sub>3/2</sub> spin-orbit doublet peaks was fixed at 5.26 eV. The peak area ratio of Pd 3d<sub>3/2</sub> to Pd 3d<sub>5/2</sub> was fixed at 2/3. The full width at half maxima (FWHM) and Lorentzian-Gaussian ratio of all the peaks were set to be equal to the others. For the O 1s XPS, the full width at half maxima (FWHM) and Lorentzian-Gaussian ratio of all the peaks were set to be equal to the others. For the Ce 3d XPS, the peak fitting is rather complex. It could be resolved into several Ce 3d<sub>5/2,3/2</sub> spin-orbit doublet peaks with splitting of around 18 eV<sup>[3]</sup> The peak area ratio of Ce 3d<sub>3/2</sub> to Ce 3d<sub>5/2</sub> was fixed at 2/3. The full width at half maxima (FWHM) and Lorentzian-Gaussian ratio of all the peaks were set to be equal to the others.

### *1.5. Synchrotron X-ray diffraction patterns*

Synchrotron X-ray diffraction (SXR) patterns were performed at BL14B of the Shanghai Synchrotron Radiation Facility (SSRF) at a wavelength of 0.6883 Å. Rietveld refinement analyses of the diffraction profiles were conducted using Rietica v1.77 program.

### *1.6. Catalytic oxidation of CO*

Catalytic activity measurements for CO oxidation were performed using a continuous-flow fixed-bed reactor. 100 mg of catalyst (250-380 μm) was sandwiched between two quartz wool layers in the microreactor. Before the test, the catalyst was pretreated under the feed gas (1.0 vol% CO and 21.0 vol% O<sub>2</sub> in N<sub>2</sub>) at a total flow rate of 100 mL min<sup>-1</sup> at 170 °C for an hour, and stored in the feed gas when cooling. Then the reaction temperature began with room temperature at a ramp of 5 °C min<sup>-1</sup> to test the catalytic activity for CO oxidation. The composition of the outgoing gas stream was determined by an on-line Agilent 7890B gas chromatograph equipped with TCD and FID detectors. The activity of pure Pd was investigated by using inert Al<sub>2</sub>O<sub>3</sub> for dispersing the Pd cubes.

For all the characterations mentioned above, all the samples were pretreated under the feed gas (1.0 vol% CO and 21.0 vol% O<sub>2</sub> in N<sub>2</sub>) at a total flow rate of 100 mL min<sup>-1</sup> at 170 °C for an hour, and stored in the feed gas when cooling.

## Figures and Tables

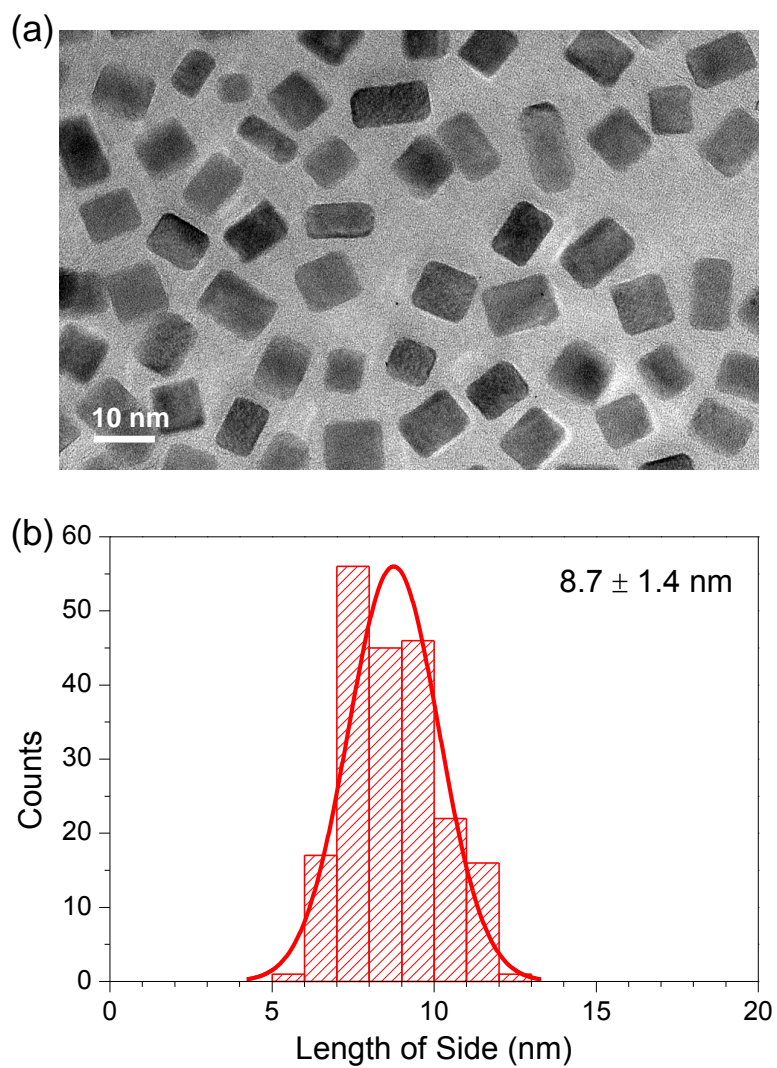

**Fig. S1** (a) TEM image of the Pd cubes. (b) Size distributions of the Pd cubes counted from the TEM images.

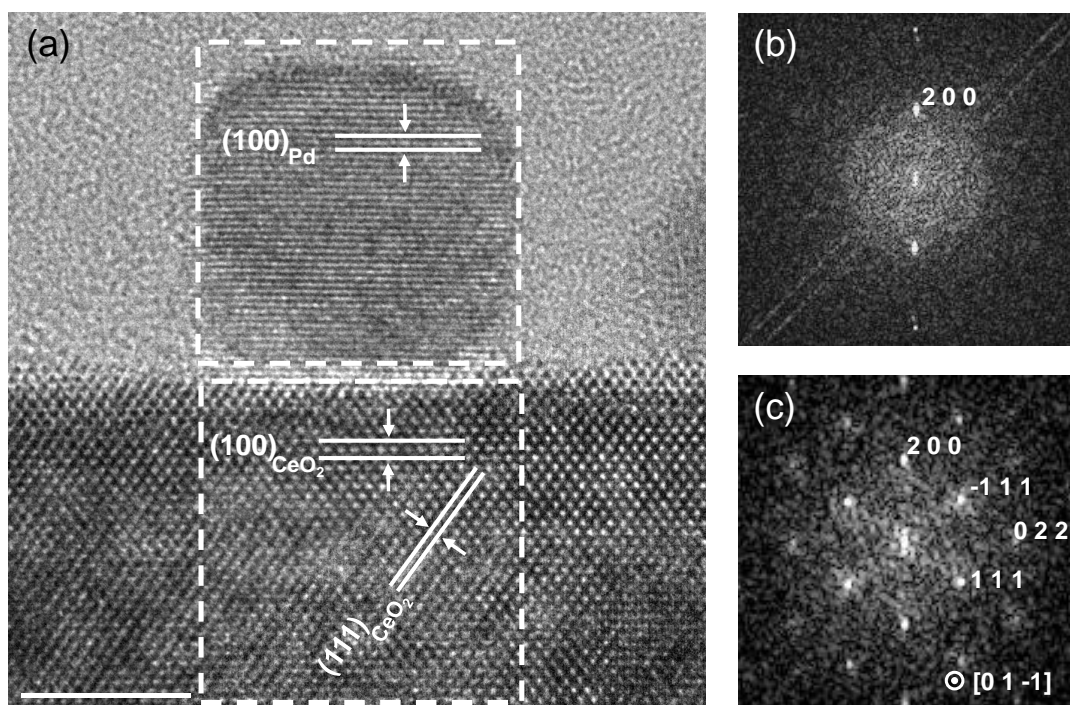

**Fig. S2** (a) Side-viewed HRTEM image of Pd/CeO<sub>2</sub> and the corresponding Fast Fourier transform pattern for the Pd cube (b) and the CeO<sub>2</sub> rod (c).

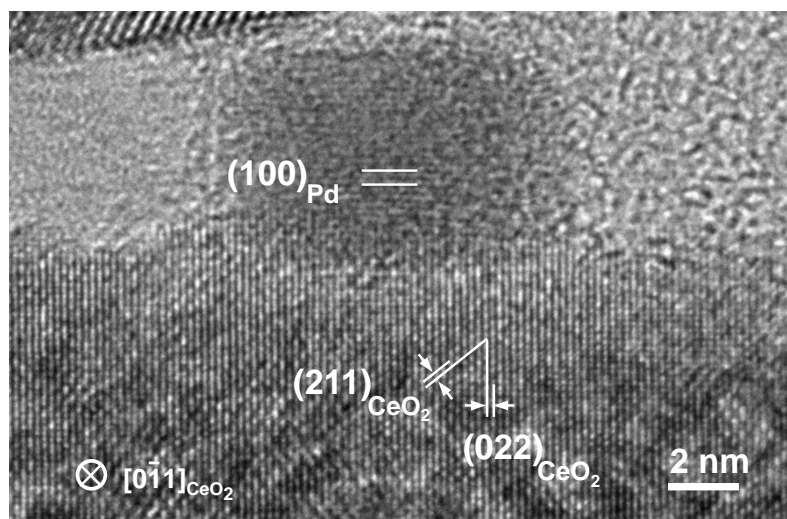

**Fig. S3** Side-viewed HRTEM image of Pd/CeO<sub>2</sub>.

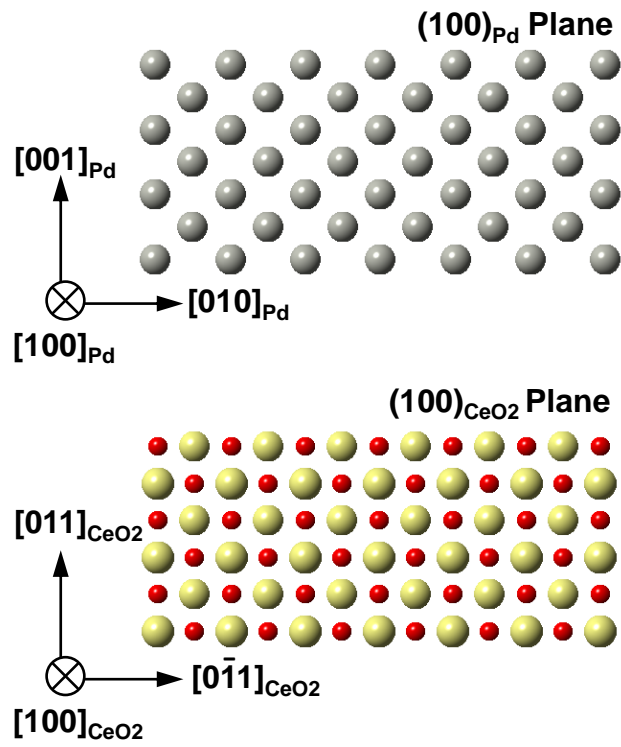

**Fig. S4** Atom arrangements of the  $(100)_{\text{Pd}}$  plane and the  $(100)_{\text{CeO}_2}$  plane showing a primitive lattice misfit for the interfacial atom arrangements.



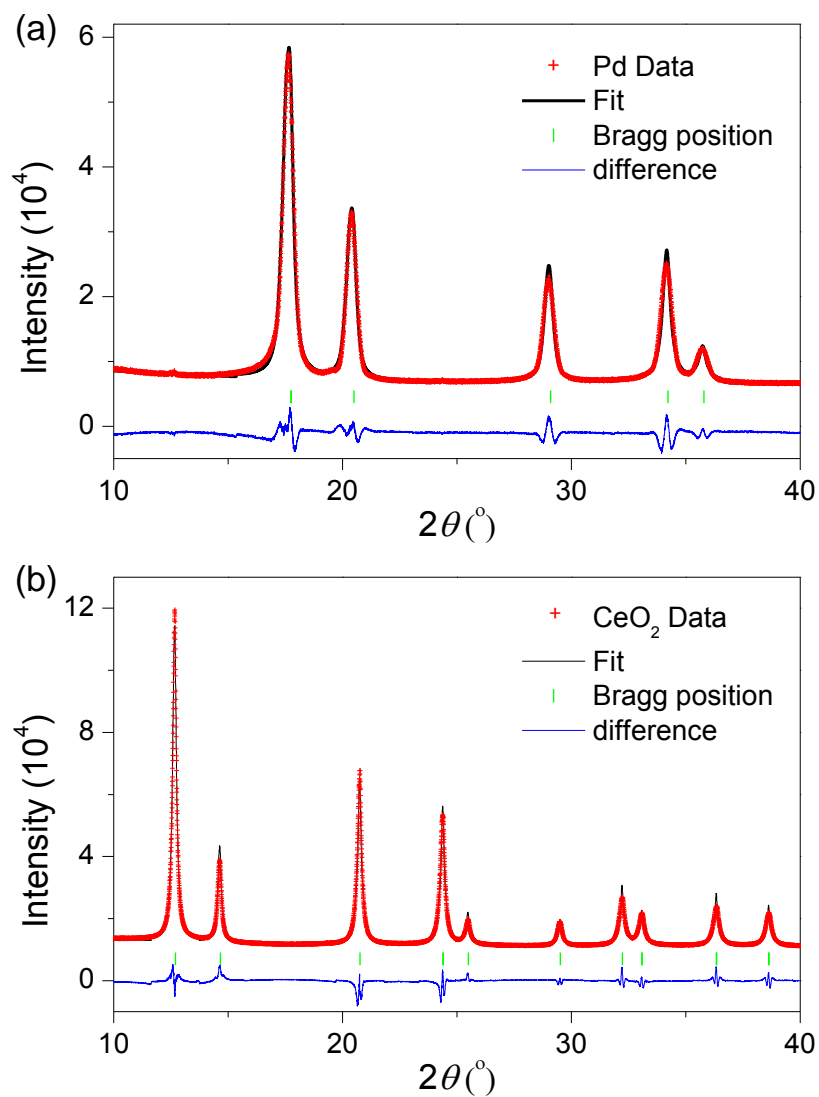

**Fig. S5** XRD patterns of Pd (a) and CeO<sub>2</sub> (b) including the Rietveld refinements.

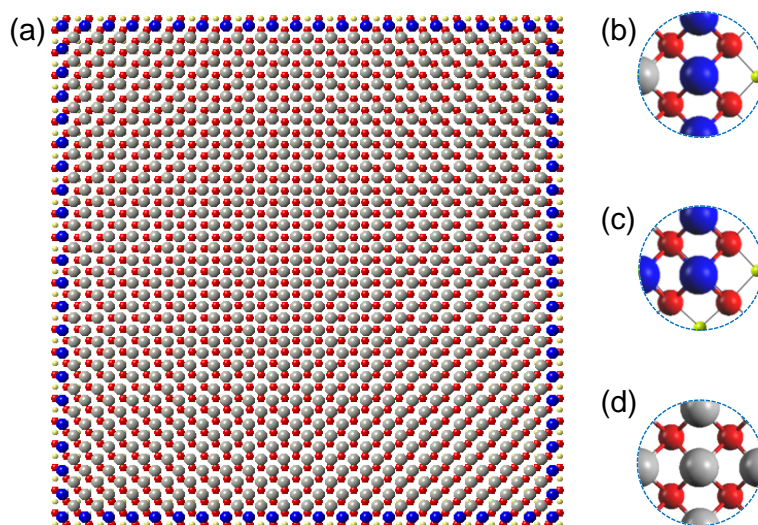

**Fig. S6** Scheme illustrating the interfacial atom arrangement (a), and the PdO<sub>4</sub> motifs at the edge (b), the corner (c) and in the interior (d) of the interfacial square. According to the size distribution of the Pd cubes in Figure S, the Pd atoms at the edges is calculated to be ~95% with respect to all Pd atoms at the periphery of the Pd cubes directly contacted with CeO<sub>2</sub>, i.e., 95% of CASs of Pd/CeO<sub>2</sub> are uniform.

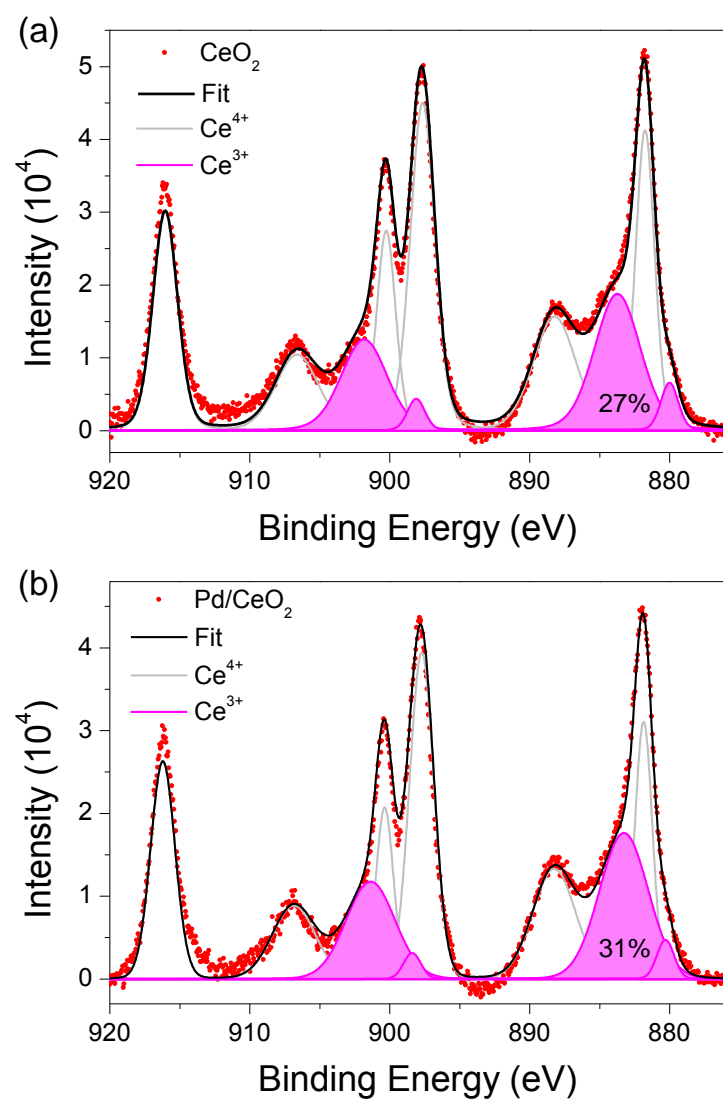

**Fig. S7** Ce 3d XPS of Pd/CeO<sub>2</sub> and CeO<sub>2</sub>.

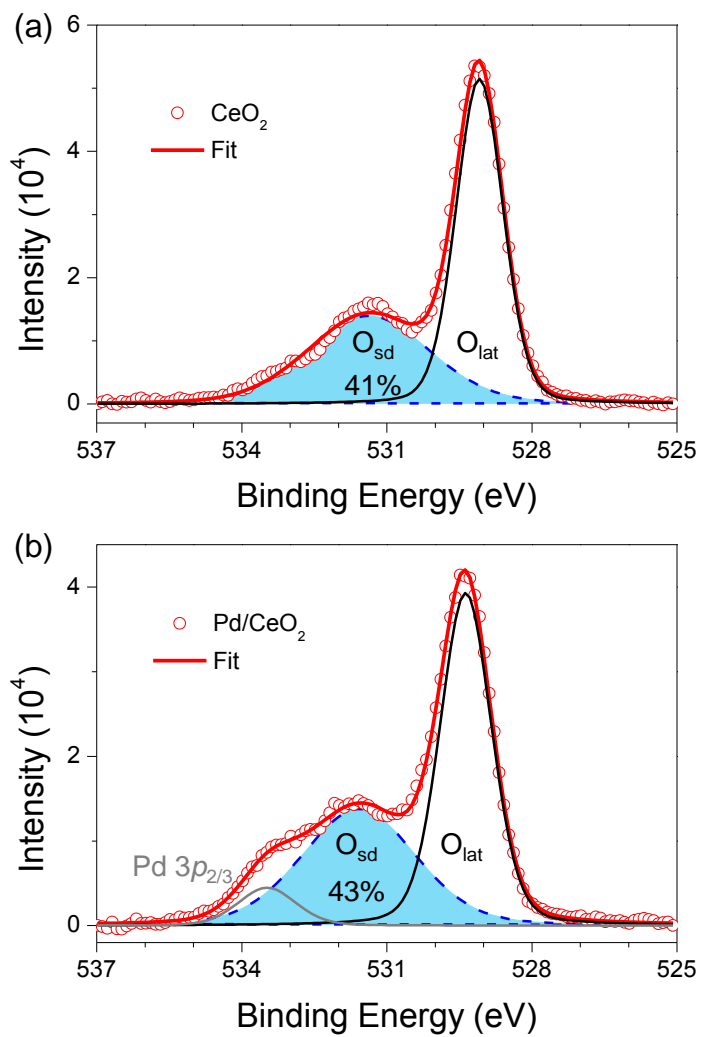

**Fig. S8** O 1s XPS of  $\text{Pd/CeO}_2$  and  $\text{CeO}_2$ . After the Pd loading, defect oxygen ions increase ~2%.

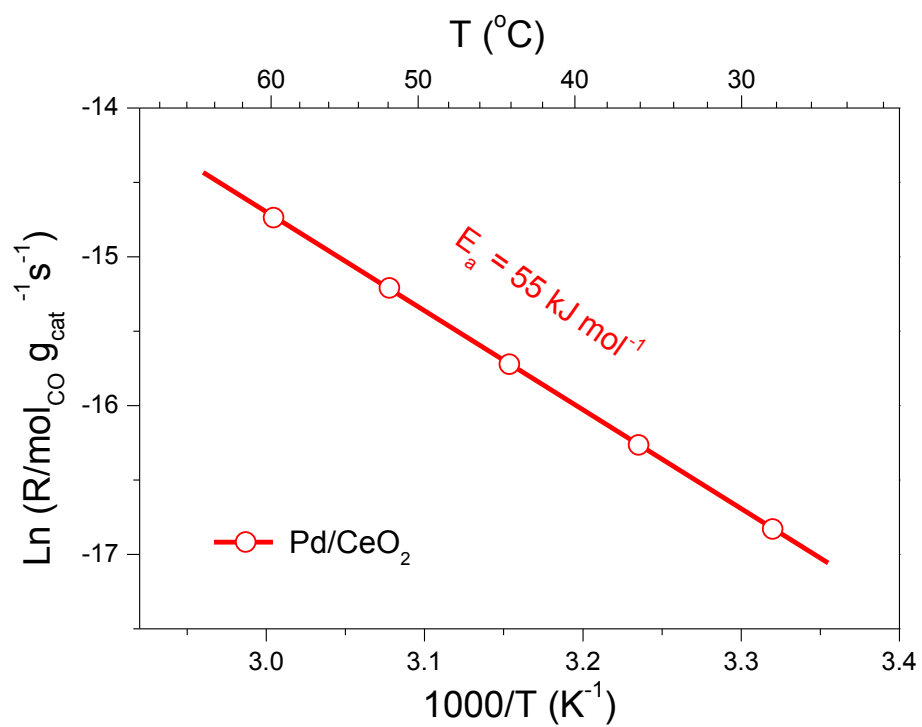

**Fig. S9** Arrhenius plot for the reaction rates in the CO oxidation and the corresponding  $E_a$  over  $\text{Pd/CeO}_2$ .

**Table S1.** Crystallographic data and details of Pd and CeO<sub>2</sub> in the SXRD data collections and the Rietveld refinements.

| Sample                                    | Pd           | CeO <sub>2</sub> |
|-------------------------------------------|--------------|------------------|
| Chemical formula                          | Pd           | CeO <sub>2</sub> |
| Crystal system                            | cubic        | cubic            |
| Space group                               | <i>FM-3m</i> | <i>FM-3m</i>     |
| Z <sup>[a]</sup>                          | 4            | 4                |
| <i>a</i> / Å                              | 3.897(6)     | 5.417(5)         |
| <i>V</i> / Å <sup>3</sup>                 | 59.2(1)      | 159.0(0)         |
| <i>R<sub>p</sub></i> <sup>[b]</sup> / %   | 5.24         | 8.35             |
| <i>R<sub>wp</sub></i> <sup>[c]</sup> / %  | 6.88         | 10.35            |
| <i>R<sub>exp</sub></i> <sup>[d]</sup> / % | 1.34         | 1.45             |
| $\chi^2$ <sup>[e]</sup>                   | 1.29         | 5.43             |
| Wavelength / Å                            | 0.6888       | 0.6888           |
| <i>2θ</i> range / °                       | 3-40         | 3-40             |
| <i>2θ</i> step width / °                  | 0.004        | 0.004            |

<sup>[a]</sup> Z, the number of the formula of Pd or CeO<sub>2</sub> units per unit cell;

<sup>[b]</sup> *R<sub>p</sub>*, the unweighted profile factor;

<sup>[c]</sup> *R<sub>wp</sub>*, the weighted profile factor;

<sup>[d]</sup> *R<sub>exp</sub>*, the expected *R* parameter;

<sup>[e]</sup>  $\chi^2$ , the goodness of fitting, defined as the square of the ratio of *R<sub>wp</sub>*/*R<sub>exp</sub>*.

**Table S2.** Structure constants of the Pd and CeO<sub>2</sub> determined by the Rietveld refinement of the corresponding SXRD data.

| Sample           | Atom | <i>x</i>  | <i>y</i> | <i>z</i> | Occupancy |
|------------------|------|-----------|----------|----------|-----------|
| Pd               | Pd   | 0         | 0        | 0        | 1.0       |
| CeO <sub>2</sub> | Ce   | 0         | 0        | 0        | 1.0       |
|                  | O    | 0.2500(0) | 0        | 0        | 1.0       |

## References

- [1] Q. Wu, F. Zhang, P. Xiao, H. Tao, X. Wang, Z. Hu and Y. Lü, *J. Phys. Chem. C*, 2008, *112*, 17076.
- [2] M. Jin, H. Liu, H. Zhang, Z. Xie, J. Liu and Y. Xia, *Nano Res.*, 2011, *4*, 83.
- [3] C. Anandan and P. Bera, *Appl. Surf. Sci.* **2013**, 283, 297.
